# Supplementary material for: Engineering superlyophobic surfaces on curable materials based on facile and inexpensive microfabrication
Source: Royal Society of Chemistry journal article supplement (doi:10.1039/c4ta00672k), 2014-01-01
Supplement: c4ta00672k1.pdf [file c4ta00672k1.pdf]

## ARTICLE

# Engineering Superlyophobic Surfaces on Curable Materials Based on Facile and Inexpensive Microfabrication

Lifang Yuan, Tianzhun Wu, Weiji zhang, Shiquan Ling, Rong Xiang, Xuchun Gui, Yuan Zhu  
and Zikang Tang

**Table S1** Water and hexadecane CAs on flat substrates at the room temperature. Each CAs were measured for at least five times.

| Liquid     | Material | $\theta_s$ [°] | Standard error [°] | $\theta_{adv}$ [°] | Standard error [°] | $\theta_{rec}$ [°] | Standard error [°] |
|------------|----------|----------------|--------------------|--------------------|--------------------|--------------------|--------------------|
| Water      | Si       | 115            | 3.9                | 118                | 3.5                | 74                 | 2.9                |
| Water      | PDMS     | 117            | 4.6                | 128                | 5.6                | 50                 | 3.0                |
| Water      | PMMA     | 113            | 3.7                | 116                | 0.7                | 64                 | 3.9                |
| Hexadecane | Si       | 74             | 4.5                | 76                 | 5.9                | 35                 | 4.5                |
| Hexadecane | PDMS     | 63             | 4.4                | 100                | 5.0                | 19                 | 1.8                |
| Hexadecane | PMMA     | 64             | 1.2                | 73                 | 2.0                | 33                 | 4.1                |
